# Supplementary material
Source: PubMed Central journal article supplement (PMC6499131)
Supplement: jamaoncol-5-e190260-s001.pdf [file jamaoncol-5-e190260-s001.pdf]

## Supplementary Online Content

Perni S, Rooney MK, Horowitz DP. Assessment of use, specificity, and readability of written clinical informed consent forms for patients with cancer undergoing radiotherapy. Published online May 2, 2019. *JAMA*. doi:10.1001/jamaoncol.2019.0260

**eMethods 1.** Questions sent to departmental leaders

**eMethods 2.** Description of readability indices

**eTable 1.** Comparison of departments offering and not offering radiotherapy consent forms in the survey

**eTable 2.** Statistics describing estimated readability of cancer radiotherapy consent forms in U.S. academic centers by seven readability measures

**eFigure 1.** Readability of consent forms for cancer radiotherapy in U.S. academic centers as measured by seven readability indices, using paired high and low estimates for each index

**eFigure 2.** Word cloud of commonly used difficult words

**eTable 3.** Commonly used difficult words with recommended alternatives

This supplementary material has been provided by the authors to give readers additional information about their work.

## **eMethods 1. Questions sent to departmental leaders**

1) Does your facility have a written radiation informed consent form that is used for routine clinical radiation treatment (outside the context of a clinical trial)?

If so, would you please send us a copy of this form for us to use as the primary data for our study? (We plan to perform detailed content analysis of the forms from many institutions to help ascertain best practices.)

2) Do you have different templates depending on the site being treated (e.g., a form used for breast cancer treatment, a form used for brain irradiation, etc.)?

If so, would you please also send us copies of the forms you use when a patient is being treated to the whole breast and also when a patient is being treated to the whole brain?

3) Are these forms provided for the patient to take home for review prior to obtaining consent?

4) Are these forms provided for the patient to take home for review after consent is obtained?

## eMethods 2. Description of readability indices

| Readability Score                                                  | Description or calculation formula                                                                                                                                                                                                                                                                                                                                                                                     |
|--------------------------------------------------------------------|------------------------------------------------------------------------------------------------------------------------------------------------------------------------------------------------------------------------------------------------------------------------------------------------------------------------------------------------------------------------------------------------------------------------|
| Degrees of Reading Power (Grade Equivalent) (DRP(GE)) <sup>1</sup> | DRP (GE) is based on: 1. character count (average length of characters) rather than syllable count; and 2. average number of familiar words in the sample text. It measures the text difficulty on a scale ranging from 1 to 100. The range from the easiest to the most difficult text that can be written in the English language is about 30-85 DRP units. DRP scores can be correlated to grade level equivalents. |
| Flesch-Kincaid (FK) <sup>2</sup>                                   | $FK = (0.39 \times ASL) + (11.8 \times ASW) - 15.59$ , where ASL = average sentence length and ASW = average number of syllables per word                                                                                                                                                                                                                                                                              |
| FORd, CAylor, STich index (FORCAST) <sup>3</sup>                   | $FORCAST = 20 - (N/10)$ , where N is number of monosyllabic words in a random 150 word sample                                                                                                                                                                                                                                                                                                                          |
| Fry <sup>4</sup>                                                   | Fry score is calculated by plotting the number of syllables per 100 words on the horizontal axis (x-axis), and the average number of sentences per 100 words on the vertical axis (y-axis). The region this point falls is an estimation of grade level.                                                                                                                                                               |
| Gunning Fog (GF) <sup>5</sup>                                      | $GF = 0.4 (ASL + PHW)$ , where ASL = average sentence length and PHW = percentage hard words, defined as words with 3+ syllables that are NOT (i) proper nouns, (ii) combinations of easy words or hyphenated words, or (iii) two-syllable verbs made into three with -es and -ed ending                                                                                                                               |
| Raygor Estimate <sup>6</sup>                                       | Raygor estimate is calculated by plotting the number of 6+ character words per 100 words on the horizontal axis (x-axis), and average number of sentence per 100 words on the vertical axis (y-axis). The region this point falls is an estimation of grade level.                                                                                                                                                     |
| Simple Measure Of Gobbledygook (SMOG) <sup>7</sup>                 | $SMOG = \sqrt{\# \text{ of } 3+ \text{ syllable words}} + 3$ in a 30 sentence sample of text                                                                                                                                                                                                                                                                                                                           |

**eTable 1. Comparison of departments offering and not offering radiotherapy consent forms in the survey**

|           | Departments not offering forms               |     |  | Departments offering forms |     | P value |
|-----------|----------------------------------------------|-----|--|----------------------------|-----|---------|
|           | <b><u>Total Programs:88*</u></b>             |     |  |                            |     |         |
|           | Count                                        | (%) |  | Count                      | (%) |         |
|           | 31                                           | 35  |  | 57                         | 65  |         |
|           | <b><u>Residency Program Size**</u></b>       |     |  |                            |     |         |
| Mean      | 8.4                                          |     |  | 9.8                        |     | 0.12    |
| Range     | 24 (4 to 28)                                 |     |  | 26 (4 to 30)               |     |         |
|           | <b><u>Research Output Ranking**</u></b>      |     |  |                            |     |         |
| Mean      | 44.8                                         |     |  | 43.0                       |     | 0.38    |
| Range     | 2 to 86                                      |     |  | 1 to 94                    |     |         |
|           | <b><u>Location**</u></b>                     |     |  |                            |     | 0.059   |
| South     | 9                                            | 29  |  | 14                         | 25  |         |
| Northeast | 9                                            | 29  |  | 17                         | 30  |         |
| West      | 10                                           | 32  |  | 8                          | 14  |         |
| Midwest   | 3                                            | 10  |  | 18                         | 32  |         |
|           | <b><u>Rural or Urban Training Site**</u></b> |     |  |                            |     | 0.53    |
| Rural     | 2                                            | 6   |  | 2                          | 4   |         |
| Urban     | 29                                           | 94  |  | 55                         | 96  |         |
|           | <b><u>Large Public University**</u></b>      |     |  |                            |     | 0.77    |
| Yes       | 11                                           | 35  |  | 22                         | 39  |         |
| No        | 20                                           | 65  |  | 35                         | 61  |         |

Differences in continuous variables between groups were assessed with one-way t-tests; differences in categorical variables between groups were measured with chi-square tests.

\*89 department were surveyed in total. One department was not included in the doximity.com residency navigator and was thus excluded from this analysis (that department did not provide consent forms).

\*\*Department characteristics determined according to doximity.com residency navigator program descriptions

**eTable 2. Statistics describing estimated readability of cancer radiotherapy consent forms in U.S. academic centers by seven readability measures**

|                      | Test            | Minimum | Maximum | Range | Mean | Number of forms at sixth grade readability level or below | %   | Number of forms at eighth grade readability level or below | %   |
|----------------------|-----------------|---------|---------|-------|------|-----------------------------------------------------------|-----|------------------------------------------------------------|-----|
| <b>Low Estimate</b>  | DRP (GE)        | 5.9     | 17.1    | 11.2  | 12.3 | 3                                                         | 2.7 | 4                                                          | 3.5 |
|                      | FK              | 5.5     | 16.9    | 11.4  | 10.6 | 4                                                         | 3.5 | 9                                                          | 8   |
|                      | Fry             | 6       | 17      | 11    | 14.2 | 1                                                         | 1.6 | 3                                                          | 4.9 |
|                      | GF              | 6.8     | 18.3    | 11.5  | 12.6 | 0                                                         | 0   | 4                                                          | 3.5 |
|                      | Raygor Estimate | 7       | 17      | 10    | 13.2 | 0                                                         | 0   | 1                                                          | 1.7 |
|                      | SMOG            | 8.5     | 18.5    | 10    | 12.9 | 0                                                         | 0   | 0                                                          | 0   |
| <b>High Estimate</b> | DRP (GE)        | 7.3     | 18      | 10.7  | 14.3 | 0                                                         | 0   | 3                                                          | 2.8 |
|                      | FK              | 6.6     | 19      | 12.4  | 12.3 | 0                                                         | 0   | 3                                                          | 2.7 |
|                      | Fry             | 11      | 17      | 6     | 15.2 | 0                                                         | 0   | 0                                                          | 0   |
|                      | GF              | 7.5     | 19      | 11.5  | 13.4 | 0                                                         | 0   | 3                                                          | 2.7 |
|                      | Raygor Estimate | 11      | 17      | 6     | 14.3 | 0                                                         | 0   | 0                                                          | 0   |
|                      | SMOG            | 9.7     | 19      | 9.3   | 14.3 | 0                                                         | 0   | 0                                                          | 0   |
|                      | FORCAST         | 10.3    | 13.6    | 3.3   | 11.5 | 0                                                         | 0   | 0                                                          | 0   |

DRP (GE) = Degrees of Reading Power (Grade Equivalent); FK = Flesch-Kincaid; FORCAST = FORd, CAylor, STich; GF = Gunning Fog; SMOG = Simple Measure Of Gobbledygook

**eFigure 1. Readability of consent forms for cancer radiotherapy in U.S. academic centers as measured by seven readability indices, using paired high and low estimates for each index**

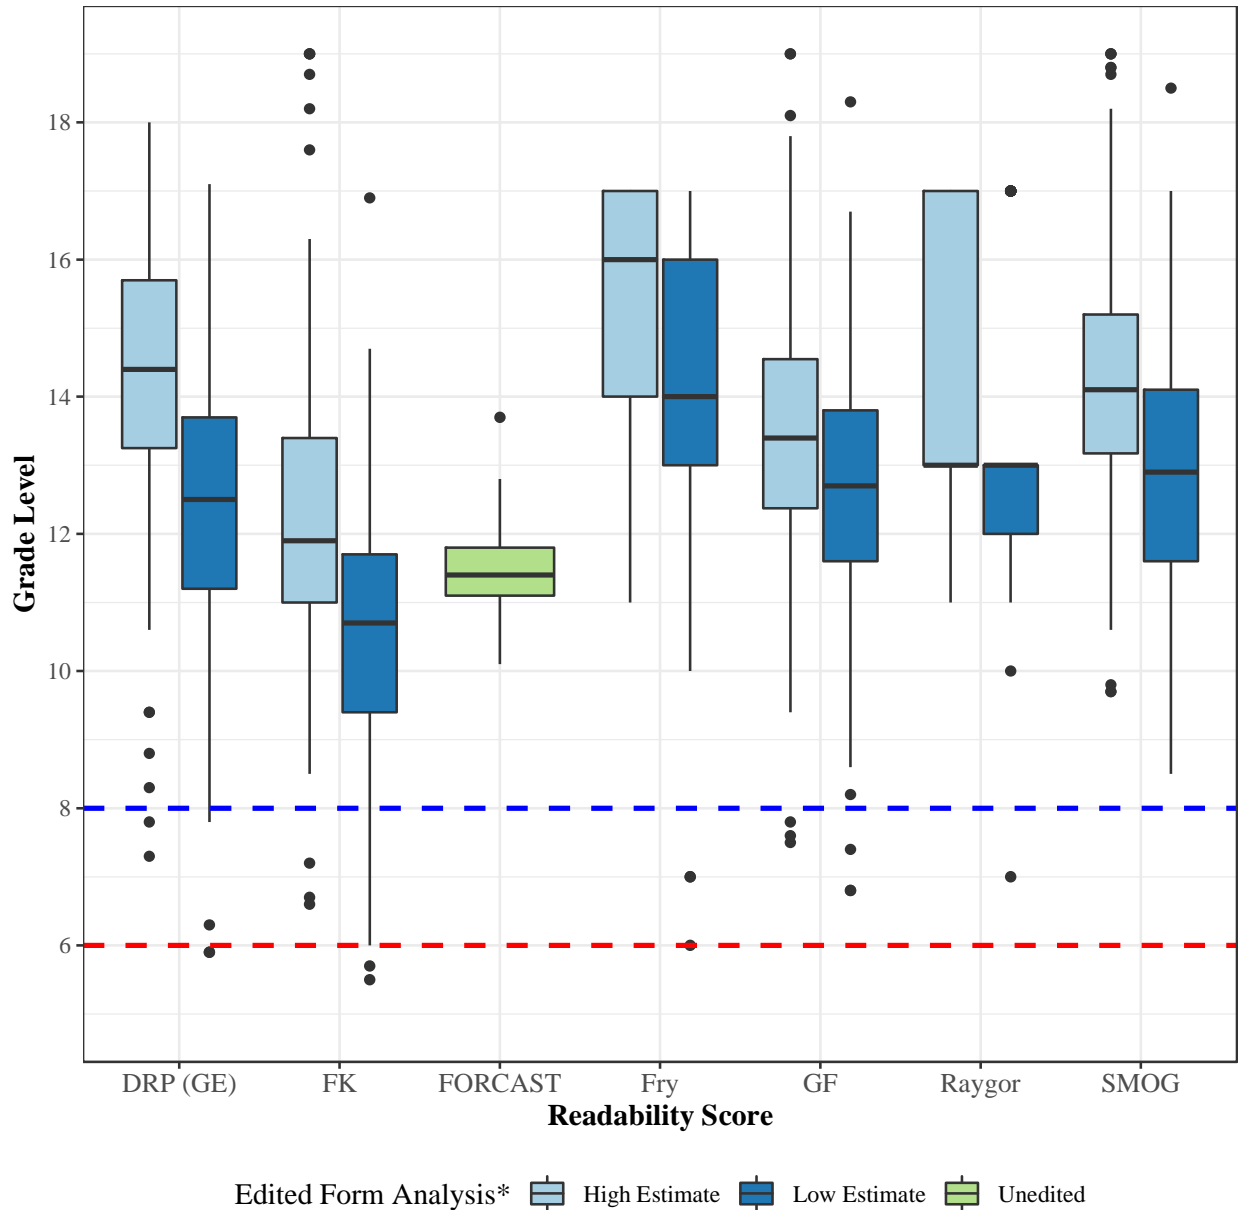

Boxes represent the median and interquartile range (IQR) for each distribution, with the lower and upper box limits defined by the 25<sup>th</sup> and 75<sup>th</sup> percentile, respectively. The median is represented by the line across each box. The upper and lower whiskers extend to the greatest and least datum within 1.5\*IQR above and below the upper and lower quartile, respectively. Any data points outside of this range are defined as outliers, and displayed as dots. Whisker end bars are not included in this plot to improve the clarity of data presentation. Maximum reported grade levels for included readability scores can range up to grade 19 (equivalent to a doctoral degree level of education) for some scores. Reported grade levels higher than grade 12 represent collegiate levels of education and above. Current recommendations from the National Cancer Institute and National Institutes of Health state that consent forms for patients should be at the 8<sup>th</sup> grade readability level or below (blue horizontal dashed line).<sup>8,9</sup> Current recommendations from the American Medical Association state that all written materials for patients should be at the 6<sup>th</sup> grade readability level or below (red horizontal dashed line).<sup>10</sup>

\*Documents were manually edited for high and low estimation of scores dependent on sentence length (for all readability scores except for FORCAST). In the high estimate, forms were altered so all lists were treated as one sentence with items separated by a comma. In the low estimate, forms were edited so all list items were treated as independent sentences separated by a period.

DRP (GE) = Degrees of Reading Power (Grade Equivalent); FK = Flesch-Kincaid; FORCAST = FORd, CAylor, STich; GF = Gunning Fog; SMOG = Simple Measure Of Gobbledygook





**eTable 3. Commonly used difficult words with recommended alternatives**

| <b>Difficult Word*</b>   | <b>Number of forms using word (%)</b> | <b>The Living Word Vocabulary grade level</b> | <b>Percent of students at grade level who understand the word meaning (%)</b> | <b>Recommended replacement? ** (yes/no)</b> | <b>Recommended alternatives **</b>            |
|--------------------------|---------------------------------------|-----------------------------------------------|-------------------------------------------------------------------------------|---------------------------------------------|-----------------------------------------------|
| alternative(-ate)        | 62 (54%)                              | 12                                            | 81                                                                            | yes                                         | other, possible                               |
| oncologist(-y)           | 35 (31%)                              | Unlisted                                      | NA                                                                            | yes                                         | cancer doctor                                 |
| simulation               | 24 (21%)                              | 12                                            | 61                                                                            | yes                                         | practice setup used to plan your treatment    |
| attending (physician)    | 21 (19%)                              | Unlisted                                      | NA                                                                            | yes                                         | senior doctor                                 |
| (contra)indicated(-ions) | 18 (16%)                              | Unlisted                                      | NA                                                                            | yes                                         | reasons to/not to do something                |
| intervention(s,-al)      | 17 (15%)                              | 12                                            | 67                                                                            | yes                                         | treatment                                     |
| recurrence(s,-t)         | 17 (15%)                              | 12                                            | 71                                                                            | yes                                         | comes back                                    |
| unanticipated            | 16 (14%)                              | Unlisted                                      | NA                                                                            | yes                                         | not expected                                  |
| practitioner             | 16 (14%)                              | 12                                            | 89                                                                            | yes                                         | medical professional                          |
| designee(s)              | 15 (13%)                              | Unlisted                                      | NA                                                                            | yes                                         | person you pick                               |
| ulceration(s)            | 15 (13%)                              | Unlisted                                      | NA                                                                            | yes                                         | wound                                         |
| malignancy(-ies)         | 15 (13%)                              | 12                                            | 71                                                                            | yes                                         | cancer                                        |
| warranty(-ies)           | 15 (13%)                              | 12                                            | 60                                                                            | yes                                         | guarantee                                     |
| necrosis                 | 13 (12%)                              | 13                                            | 46                                                                            | yes                                         | death of body cells                           |
| personnel                | 14 (12%)                              | 12                                            | 84                                                                            | yes                                         | people, professionals                         |
| (in)competent(-ce)       | 13 (12%)                              | 12                                            | 73                                                                            | yes                                         | qualified, qualifications                     |
| neurologic(al)           | 13 (12%)                              | 12                                            | 74                                                                            | yes                                         | related to the brain or nerves                |
| implanted(-able)         | 12 (11%)                              | 12                                            | 67                                                                            | yes                                         | something put in                              |
| arterial(-y,-ies)        | 10 (9%)                               | 13                                            | 54                                                                            | yes                                         | related to the blood or blood carrying system |

| prognosis(-tic)         | 10 (9%)                               | 13                                            | 60                                                                            | yes                                         | future prediction                                      |
|-------------------------|---------------------------------------|-----------------------------------------------|-------------------------------------------------------------------------------|---------------------------------------------|--------------------------------------------------------|
| <b>Difficult Word*</b>  | <b>Number of forms using word (%)</b> | <b>The Living Word Vocabulary grade level</b> | <b>Percent of students at grade level who understand the word meaning (%)</b> | <b>Recommended replacement? ** (yes/no)</b> | <b>Recommended alternatives **</b>                     |
| intravenous(ly)         | 10 (9%)                               | 12                                            | 83                                                                            | yes                                         | into veins                                             |
| terminate(d,-ion)       | 10 (9%)                               | 12                                            | 80                                                                            | yes                                         | end, stop                                              |
| defibrillator           | 9 (8%)                                | Unlisted                                      | NA                                                                            | yes                                         | device to shock the heart                              |
| lymph(edema)            | 9 (8%)                                | Unlisted                                      | NA                                                                            | yes                                         | swelling                                               |
| impairment              | 8 (7%)                                | 12                                            | 58                                                                            | yes                                         | disability                                             |
| laterality              | 8 (7%)                                | 12                                            | 76                                                                            | yes                                         | to the side                                            |
| multiple                | 8 (7%)                                | 12                                            | 70                                                                            | yes                                         | more than one                                          |
| therapeutic             | 8 (7%)                                | 12                                            | 73                                                                            | yes                                         | healing, treating, curing                              |
| pneumonitis             | 8 (7%)                                | Unlisted                                      | NA                                                                            | yes                                         | damaged or irritated lung                              |
| contraception(-ve)      | 7 (6%)                                | 16                                            | 72                                                                            | yes                                         | something to prevent pregnancy                         |
| surrogate               | 7 (6%)                                | 16                                            | 42                                                                            | yes                                         | fill-in, substitute, act in place of                   |
| pathologist(-al)        | 7 (6%)                                | 13                                            | 65                                                                            | yes                                         | doctors who specialize in looking under the microscope |
| (myo)pericarditis(-ium) | 7 (6%)                                | 12                                            | 77                                                                            | yes                                         | inflammation of the heart or heart sac                 |
| brachial                | 6 (5%)                                | Unlisted                                      | NA                                                                            | yes                                         | related to the arm                                     |
| attestation             | 6 (5%)                                | 13                                            | 73                                                                            | yes                                         | proof, evidence                                        |
| catheter(ization)       | 6 (5%)                                | 13                                            | 49                                                                            | yes                                         | urine tube                                             |
| radiology(-ic,-graphic) | 6 (5%)                                | 13                                            | 32                                                                            | yes                                         | related to x rays or medical scans                     |
| adversely               | 6 (5%)                                | 12                                            | 70                                                                            | yes                                         | negatively                                             |
| alleviate               | 6 (5%)                                | 12                                            | 79                                                                            | yes                                         | to make better                                         |
| fibrosis                | 5 (4%)                                | Unlisted                                      | NA                                                                            | yes                                         | hardening                                              |
| stereotactic            | 5 (4%)                                | Unlisted                                      | NA                                                                            | yes                                         | highly accurate aiming and body position               |

|                          |                                       |                                               |                                                                               |                                             |                                                        |
|--------------------------|---------------------------------------|-----------------------------------------------|-------------------------------------------------------------------------------|---------------------------------------------|--------------------------------------------------------|
| hysterectomy             | 4 (4%)                                | Unlisted                                      | NA                                                                            | yes                                         | surgery to remove the uterus                           |
| plexopathy               | 4 (4%)                                | Unlisted                                      | NA                                                                            | yes                                         | damage to the nerves                                   |
| <b>Difficult Word*</b>   | <b>Number of forms using word (%)</b> | <b>The Living Word Vocabulary grade level</b> | <b>Percent of students at grade level who understand the word meaning (%)</b> | <b>Recommended replacement? ** (yes/no)</b> | <b>Recommended alternatives **</b>                     |
| cognitive(-ion)          | 5 (4%)                                | 13                                            | 62                                                                            | yes                                         | related to thinking ability                            |
| palpitations             | 5 (4%)                                | 13                                            | 69                                                                            | yes                                         | abnormal feeling of heart beat                         |
| metastasis(-ic)          | 4 (4%)                                | 13                                            | 63                                                                            | yes                                         | spread of the cancer                                   |
| resuscitate(d,-ion,-ive) | 4 (4%)                                | 13                                            | 71                                                                            | yes                                         | bring back to health, restore                          |
| accelerator              | 5 (4%)                                | 12                                            | 61                                                                            | yes                                         | machine to create high energy beams                    |
| bilateral                | 5 (4%)                                | 12                                            | 77                                                                            | yes                                         | both sides                                             |
| dilation(-ed)            | 5 (4%)                                | 12                                            | 67                                                                            | yes                                         | make bigger                                            |
| intensive                | 5 (4%)                                | 12                                            | 69                                                                            | yes                                         | extreme, severe                                        |
| components               | 4 (4%)                                | 12                                            | 81                                                                            | yes                                         | parts                                                  |
| hemorrhage               | 4 (4%)                                | 12                                            | 79                                                                            | yes                                         | bleed                                                  |
| angiography              | 3 (3%)                                | Unlisted                                      | NA                                                                            | yes                                         | procedure to view the blood vessels                    |
| cardiologist             | 3 (3%)                                | Unlisted                                      | NA                                                                            | yes                                         | heart doctor                                           |
| cesium                   | 3 (3%)                                | Unlisted                                      | NA                                                                            | yes                                         | radiation source                                       |
| cholecystectomy          | 3 (3%)                                | Unlisted                                      | NA                                                                            | yes                                         | surgery to remove the gallbladder                      |
| contracture(s)           | 3 (3%)                                | Unlisted                                      | NA                                                                            | yes                                         | permanent shortening                                   |
| cystoscopy               | 3 (3%)                                | Unlisted                                      | NA                                                                            | yes                                         | procedure to look into the bladder                     |
| dysfunction              | 3 (3%)                                | Unlisted                                      | NA                                                                            | yes                                         | problems with                                          |
| electromagnetic          | 3 (3%)                                | Unlisted                                      | NA                                                                            | yes                                         | high energy beam                                       |
| fiducials                | 3 (3%)                                | Unlisted                                      | NA                                                                            | yes                                         | markers                                                |
| laparoscopy(-ic)         | 3 (3%)                                | Unlisted                                      | NA                                                                            | yes                                         | procedure to look into the abdomen with a small camera |
| laparotomy               | 3 (3%)                                | Unlisted                                      | NA                                                                            | yes                                         | surgery to open the abdomen                            |

|                        |                                       |                                               |                                                                               |                                             |                                                              |
|------------------------|---------------------------------------|-----------------------------------------------|-------------------------------------------------------------------------------|---------------------------------------------|--------------------------------------------------------------|
| neurotoxin(s)          | 3 (3%)                                | Unlisted                                      | NA                                                                            | yes                                         | substance that hurts the nerves                              |
| retransfer             | 3 (3%)                                | Unlisted                                      | NA                                                                            | yes                                         | transfer again                                               |
| <b>Difficult Word*</b> | <b>Number of forms using word (%)</b> | <b>The Living Word Vocabulary grade level</b> | <b>Percent of students at grade level who understand the word meaning (%)</b> | <b>Recommended replacement? ** (yes/no)</b> | <b>Recommended alternatives **</b>                           |
| sternotomy             | 3 (3%)                                | Unlisted                                      | NA                                                                            | yes                                         | surgery to open the chest near the breastbone                |
| tomography             | 3 (3%)                                | Unlisted                                      | NA                                                                            | yes                                         | mapping                                                      |
| unemancipated          | 3 (3%)                                | Unlisted                                      | NA                                                                            | yes                                         | minor who is under legal supervision of parents or guardians |
| analgesia              | 3 (3%)                                | 16                                            | 73                                                                            | yes                                         | pain management                                              |
| arrhythmia(s)          | 3 (3%)                                | 16                                            | 46                                                                            | yes                                         | problems with heart beat                                     |
| dialysis               | 3 (3%)                                | 16                                            | 51                                                                            | yes                                         | procedure to clean the blood                                 |
| entity                 | 3 (3%)                                | 16                                            | 56                                                                            | yes                                         | person                                                       |
| orifice                | 3 (3%)                                | 16                                            | 63                                                                            | yes                                         | opening, hole                                                |
| palliative(-ion)       | 3 (3%)                                | 16                                            | 60                                                                            | yes                                         | improve symptoms                                             |
| adjudicated            | 3 (3%)                                | 13                                            | 61                                                                            | yes                                         | judged, declared                                             |
| coercion               | 3 (3%)                                | 13                                            | 52                                                                            | yes                                         | pressured or forced to do something                          |
| emission               | 3 (3%)                                | 13                                            | 72                                                                            | yes                                         | release                                                      |
| retrospective          | 3 (3%)                                | 13                                            | 75                                                                            | yes                                         | looking back                                                 |
| attendant              | 3 (3%)                                | 12                                            | 78                                                                            | yes                                         | witness, person present                                      |
| biopsy                 | 3 (3%)                                | 12                                            | 80                                                                            | yes                                         | tissue sample                                                |
| collectively           | 3 (3%)                                | 12                                            | 70                                                                            | yes                                         | together                                                     |
| cumulative             | 3 (3%)                                | 12                                            | 82                                                                            | yes                                         | sum, total                                                   |
| debilitation(-ing)     | 3 (3%)                                | 12                                            | 55                                                                            | yes                                         | weakness, weakening                                          |
| deficit(s)             | 3 (3%)                                | 12                                            | 72                                                                            | yes                                         | problem with                                                 |
| disposition            | 3 (3%)                                | 12                                            | 57                                                                            | yes                                         | arrangement, placement                                       |
| extremity(-ies)        | 3 (3%)                                | 12                                            | 73                                                                            | yes                                         | arms and legs                                                |

|                        |                                       |                                               |                                                                               |                                             |                                    |
|------------------------|---------------------------------------|-----------------------------------------------|-------------------------------------------------------------------------------|---------------------------------------------|------------------------------------|
| foregoing              | 3 (3%)                                | 12                                            | 67                                                                            | yes                                         | going without                      |
| inadvertent            | 3 (3%)                                | 12                                            | 68                                                                            | yes                                         | not intended                       |
| <b>Difficult Word*</b> | <b>Number of forms using word (%)</b> | <b>The Living Word Vocabulary grade level</b> | <b>Percent of students at grade level who understand the word meaning (%)</b> | <b>Recommended replacement? ** (yes/no)</b> | <b>Recommended alternatives **</b> |
| ionizing               | 3 (3%)                                | 12                                            | 78                                                                            | yes                                         | energized                          |
| undersigned            | 3 (3%)                                | 12                                            | 83                                                                            | yes                                         | person signing                     |
| irradiated(-ion)       | 20 (18%)                              | 13                                            | 45                                                                            | no                                          | NA                                 |
| delivery               | 14 (12%)                              | 12                                            | 63                                                                            | no                                          | NA                                 |
| radiotherapy           | 13 (12%)                              | 12                                            | 50                                                                            | no                                          | NA                                 |
| relevant               | 10 (9%)                               | 16                                            | 71                                                                            | no                                          | NA                                 |
| hormonal               | 8 (7%)                                | Unlisted                                      | NA                                                                            | no                                          | NA                                 |
| digital                | 7 (6%)                                | Unlisted                                      | NA                                                                            | no                                          | NA                                 |
| electronic(ally)       | 7 (6%)                                | Unlisted                                      | NA                                                                            | no                                          | NA                                 |
| menopause(-al)         | 6 (5%)                                | 12                                            | 71                                                                            | no                                          | NA                                 |
| expertise              | 4 (4%)                                | Unlisted                                      | NA                                                                            | no                                          | NA                                 |
| instances              | 5 (4%)                                | 12                                            | 65                                                                            | no                                          | NA                                 |
| videotaping(s)         | 5 (4%)                                | 12                                            | 65                                                                            | no                                          | NA                                 |
| outpatient             | 4 (4%)                                | 12                                            | 60                                                                            | no                                          | NA                                 |
| breastfeeding          | 3 (3%)                                | Unlisted                                      | NA                                                                            | no                                          | NA                                 |
| ongoing                | 3 (3%)                                | Unlisted                                      | NA                                                                            | no                                          | NA                                 |

\*Inclusion criteria for a “commonly used difficult word”: 1) Any word with ≥3 syllables that was used at least once in ≥3 forms and; 2) was either unlisted or categorized as ≥12<sup>th</sup> grade readability level by The Living Word Vocabulary list

\*\*Words meeting inclusion criteria were individually reviewed by the authors and consensus recommendations were developed for words warranting replacement

NA = Not applicable

## References:

1. Kibby MW. Test Review: The Degrees of Reading Power. *J Reading*. 1981;24(5):416-427.
2. Flesch R. A new readability yardstick. *J Appl Psychol*. 1948;32(3):221-233.
3. Caylor J. S. SST, Fox L.C., Ford J.P. Methodologies for determining reading requirements of military occupational specialties: technical report. Alexander, Virginia: Human Resources Research Organization; 1973.
4. Fry E. A Readability Formula That Saves Time. *J Reading*. 1968;11(7):513-578.
5. Gunning R. *The Technique of Clear Writing*. New York: McGraw-Hill; 1952.
6. Raygor AL. The Raygor readability estimate: a quick and easy way to determine difficulty. National Reading Conference; 1977; Clemson, South Carolina.
7. McLaughlin GH. SMOG grading: a new readability formula. *J Reading*. 1969(12):639-646.
8. How to Write Easy-to-Read Health Materials. 2017; <http://www.nlm.nih.gov/medlineplus/etr.html>. Accessed August 20, 2018.
9. Comprehensive Working Group on Informed Consent in Cancer Clinical Trials for the National Cancer Institute. Recommendations for the Development of Informed Consent Documents for Cancer Clinical Trials; 2011; [http://people.musc.edu/~elg26/teaching/MCCR2015/Lectures/Lecture24\\_InformedConsent/2.%20Simplification%20of%20Informed%20Consent.doc](http://people.musc.edu/~elg26/teaching/MCCR2015/Lectures/Lecture24_InformedConsent/2.%20Simplification%20of%20Informed%20Consent.doc). Accessed October 12, 2018.
10. Weiss BD. *Health literacy: A Manual for Clinicians*. Chicago, IL: American Medical Association Foundation and American Medical Association; 2003.
